# Supplementary material for: Stormwater Runoff Pollutant Loading Distributions and Their Correlation with Rainfall and Catchment Characteristics in a Rapidly Industrialized City
Source: PubMed Central journal article supplement (PMC4361324; doi:10.1371/journal.pone.0118776), 2015-03-16
Supplement: pone.0118776.s001.pdf [file pone.0118776.s001.pdf]

1 **SUPPORTING INFORMATION**

2

3 **Stormwater Runoff Pollutant Loading Distributions and Their Correlation with**  
4 **Rainfall and Catchment Characteristics in a Rapidly Industrialized City**

5 **Dongya Li <sup>1</sup>, Jinquan Wan <sup>1,2,\*</sup>, Yongwen Ma <sup>1,3</sup>, Yan Wang <sup>1</sup>, Mingzhi Huang <sup>1</sup>**  
6 **and Yangmei Chen <sup>1</sup>**

7 <sup>1</sup> College of Environment and Energy, South China University of Technology, Guangzhou 510006,  
8 China;

9 <sup>2</sup> The Key Lab of Pollution Control and Ecosystem Restoration in Industry Clusters, Ministry of  
10 Education, Guangzhou 510006, China

11 <sup>3</sup> State Key Laboratory of Pulp and Paper Engineering, South China University of Technology,  
12 Guangzhou 510640, China

13 \* Author to whom correspondence should be addressed; E-Mail: ppjqwan@scut.edu.cn; Tel./Fax:  
14 +86-020-87114970.

16 **Tables**

17 **Table A.** Stormwater event mean concentrations (*EMCs*) data for Dalingshan catchment.

18 **Table B.** Stormwater event mean concentrations (*EMCs*) data for Niushan catchment.

19 **Table C.** Stormwater event mean concentrations (*EMCs*) data for Tongsha catchment.

20 **Table D.** Stormwater event pollution loads per unit area (*EPLs*) data for Dalingshan catchment.

21 **Table E.** Stormwater event pollution loads per unit area (*EPLs*) data for Niushan catchment.

22 **Table F.** Stormwater event pollution loads per unit area (*EPLs*) data for Tongsha catchment.

23 **Table G.** Stormwater pollutant loads rate transported by the first 40% of runoff volume (*FF40*) data  
24 for DalingshanTongsha catchment.

25 **Table H.** Stormwater pollutant loads rate transported by the first 40% of runoff volume (*FF40*) data  
26 for Niushan catchment.

27 **Table I.** Stormwater pollutant loads rate transported by the first 40% of runoff volume (*FF40*) data for  
28 Tongsha catchment.

29

30 **Table A.** Stormwater event mean concentrations (*EMCs*) data for Dalingshan catchment

31

| <i>Date</i> | <i>COD</i> | <i>TSS</i> | <i>TN</i> | <i>TP</i> | <i>NH<sub>4</sub><sup>+</sup>-N</i> | <i>Fe</i> | <i>Zn</i> |
|-------------|------------|------------|-----------|-----------|-------------------------------------|-----------|-----------|
| 15/4/2009   | 277.44     | 416.01     | 15.23     | 3.87      | 7.75                                | 2.98      | 0.57      |
| 15/9/2009   | 287.75     | 352.36     | 3.67      | 1.09      | 1.79                                | 0.33      | 0.22      |
| 20/10/2009  | 103.25     | 194.15     | 6.29      | 0.42      | 5.10                                | 1.8       | 0.41      |
| 2/6/2010    | 121.21     | 141.03     | 3.49      | 1.72      | 1.35                                | 0.12      | 0.12      |
| 28/6/2010   | 467.63     | 516.49     | 20.42     | 4.74      | 5.71                                | 2.34      | 0.43      |
| 20/10/2010  | 395.83     | 297.34     | 13.53     | 2.69      | 8.60                                | 2.61      | 0.3       |
| 16/4/2011   | 334.97     | 395.63     | 39.05     | 3.81      | 9.13                                | 1.54      | 0.11      |
| 3/5/2011    | 144.32     | 187.62     | 5.03      | 0.75      | 3.51                                | 0.78      | 0.35      |
| 9/8/2011    | 328.55     | 462.83     | 27.02     | 7.09      | 6.04                                | 1.32      | 0.44      |
| 21/9/2011   | 567.11     | 708.40     | 33.22     | 5.55      | 6.25                                | 1.77      | 0.38      |

32

33

34 **Table B.** Stormwater event mean concentrations (*EMCs*) data for Niushan catchment

35

| <i>Date</i> | <i>COD</i> | <i>TSS</i> | <i>TN</i> | <i>TP</i> | <i>NH<sub>4</sub><sup>+</sup>-N</i> | <i>Fe</i> | <i>Zn</i> | <i>Cu</i> |
|-------------|------------|------------|-----------|-----------|-------------------------------------|-----------|-----------|-----------|
| 15/4/2009   | 291.33     | 337.89     | 13.18     | 3.65      | 7.49                                | 6.78      | 4.78      | 0.47      |
| 15/9/2009   | 164.48     | 216.10     | 2.46      | 0.86      | 1.71                                | 1.3       | 2.10      | 0.13      |
| 20/10/2009  | 92.04      | 134.07     | 4.86      | 0.67      | 3.72                                | 4.1       | 3.60      | 0.37      |
| 2/6/2010    | 270.68     | 184.10     | 6.45      | 1.39      | 0.99                                | 1.23      | 1.80      | 0.39      |
| 28/6/2010   | 331.28     | 427.55     | 13.97     | 4.06      | 4.56                                | 5.4       | 4.80      | 0.21      |
| 20/10/2010  | 106.09     | 435.83     | 6.01      | 1.42      | 5.08                                | 4.54      | 1.57      | 0.33      |
| 16/4/2011   | 187.11     | 239.06     | 9.05      | 2.26      | 7.09                                | 6         | 5.07      | 0.11      |
| 3/5/2011    | 203.36     | 258.25     | 5.30      | 2.15      | 4.77                                | 3.7       | 3.43      | 0.41      |
| 9/8/2011    | 81.93      | 96.93      | 16.65     | 1.48      | 2.62                                | 5.89      | 2.70      | 0.38      |
| 21/9/2011   | 486.22     | 651.30     | 11.88     | 3.24      | 4.72                                | 3.76      | 5.12      | 0.29      |

36

37

38

39 **Table C.** Stormwater event mean concentrations (*EMCs*) data for Tongsha catchment

40

| <i>Date</i> | <i>COD</i> | <i>TSS</i> | <i>TN</i> | <i>TP</i> | <i>NH<sub>4</sub><sup>+</sup>-N</i> | <i>Fe</i> |
|-------------|------------|------------|-----------|-----------|-------------------------------------|-----------|
| 15/4/2009   | 67.97      | 107.68     | 2.78      | 0.98      | 1.00                                | 0.85      |
| 15/9/2009   | 56.90      | 58.20      | 1.51      | 0.43      | 0.45                                | 0.22      |
| 20/10/2009  | 71.36      | 92.59      | 1.88      | 0.32      | 0.93                                | 0.51      |
| 2/6/2010    | 24.41      | 25.80      | 3.32      | 0.43      | 0.12                                | 0.13      |
| 28/6/2010   | 81.17      | 96.76      | 1.45      | 1.79      | 1.19                                | 0.46      |
| 20/10/2010  | 122.21     | 133.09     | 1.22      | 0.28      | 1.36                                | 0.58      |
| 16/4/2011   | 106.02     | 117.83     | 3.32      | 0.09      | 1.08                                | 0.33      |
| 3/5/2011    | 71.31      | 84.26      | 0.91      | 1.52      | 0.98                                | 0.15      |
| 9/8/2011    | 17.18      | 78.11      | 4.34      | 0.28      | 0.37                                | 0.11      |
| 21/9/2011   | 60.86      | 72.87      | 2.60      | 4.05      | 1.05                                | 0.31      |

41

42

43

44 **Table D.** Stormwater event pollution loads per unit area (*EPLs*) data for Dalingshan catchment

| <i>Date</i> | <i>COD</i> | <i>TSS</i> | <i>TN</i> | <i>TP</i> | <i>NH<sub>4</sub><sup>+</sup>-N</i> | <i>Fe</i> | <i>Zn</i> |
|-------------|------------|------------|-----------|-----------|-------------------------------------|-----------|-----------|
| 15/4/2009   | 130.92     | 196.30     | 7.19      | 1.83      | 3.66                                | 1.41      | 0.27      |
| 15/9/2009   | 25.29      | 30.97      | 0.32      | 0.10      | 0.16                                | 0.03      | 0.02      |
| 20/10/2009  | 8.08       | 15.19      | 0.49      | 0.03      | 0.40                                | 0.14      | 0.03      |
| 2/6/2010    | 9.10       | 10.59      | 0.26      | 0.13      | 0.10                                | 0.01      | 0.01      |
| 28/6/2010   | 126.09     | 139.27     | 5.50      | 1.28      | 1.54                                | 0.63      | 0.12      |
| 20/10/2010  | 132.15     | 99.26      | 4.52      | 0.90      | 2.87                                | 0.87      | 0.10      |
| 16/4/2011   | 33.87      | 40.00      | 3.95      | 0.39      | 0.92                                | 0.16      | 0.01      |
| 3/5/2011    | 11.63      | 15.12      | 0.41      | 0.06      | 0.28                                | 0.06      | 0.03      |
| 9/8/2011    | 55.99      | 78.87      | 4.60      | 1.21      | 1.03                                | 0.22      | 0.07      |
| 21/9/2011   | 38.23      | 47.75      | 2.24      | 0.37      | 0.42                                | 0.12      | 0.03      |

45

46

47 **Table E.** Stormwater event pollution loads per unit area (*EPLs*) data for Niushan catchment

| <i>Date</i> | <i>COD</i> | <i>TSS</i> | <i>TN</i> | <i>TP</i> | <i>NH<sub>4</sub><sup>+</sup>-N</i> | <i>Fe</i> | <i>Zn</i> | <i>Cu</i> |
|-------------|------------|------------|-----------|-----------|-------------------------------------|-----------|-----------|-----------|
| 15/4/2009   | 138.30     | 160.40     | 6.26      | 1.73      | 3.55                                | 3.22      | 2.27      | 0.22      |
| 15/9/2009   | 16.22      | 21.31      | 0.24      | 0.08      | 0.17                                | 0.13      | 0.21      | 0.01      |
| 20/10/2009  | 7.24       | 10.55      | 0.38      | 0.05      | 0.29                                | 0.32      | 0.28      | 0.03      |
| 2/6/2010    | 20.45      | 13.91      | 0.49      | 0.11      | 0.07                                | 0.09      | 0.14      | 0.03      |
| 28/6/2010   | 89.86      | 115.98     | 3.79      | 1.10      | 1.24                                | 1.46      | 1.30      | 0.06      |
| 20/10/2010  | 35.63      | 146.37     | 2.02      | 0.48      | 1.71                                | 1.52      | 0.53      | 0.11      |
| 16/4/2011   | 19.03      | 24.32      | 0.92      | 0.23      | 0.72                                | 0.61      | 0.52      | 0.01      |
| 3/5/2011    | 16.60      | 21.09      | 0.43      | 0.18      | 0.39                                | 0.30      | 0.28      | 0.03      |
| 9/8/2011    | 14.04      | 16.61      | 2.85      | 0.25      | 0.45                                | 1.01      | 0.46      | 0.07      |
| 21/9/2011   | 32.97      | 44.17      | 0.81      | 0.22      | 0.32                                | 0.25      | 0.35      | 0.02      |

48

49

50 **Table F.** Stormwater event pollution loads per unit area (*EPLs*) data for Tongsha catchment

| <i>Date</i> | <i>COD</i> | <i>TSS</i> | <i>TN</i> | <i>TP</i> | <i>NH<sub>4</sub><sup>+</sup>-N</i> | <i>Fe</i> |
|-------------|------------|------------|-----------|-----------|-------------------------------------|-----------|
| 15/4/2009   | 19.14      | 30.33      | 0.78      | 0.27      | 0.28                                | 0.24      |
| 15/9/2009   | 4.00       | 4.10       | 0.11      | 0.03      | 0.03                                | 0.02      |
| 20/10/2009  | 3.33       | 4.32       | 0.09      | 0.02      | 0.04                                | 0.02      |
| 2/6/2010    | 1.09       | 1.16       | 0.15      | 0.02      | 0.01                                | 0.01      |
| 28/6/2010   | 13.06      | 15.57      | 0.23      | 0.29      | 0.19                                | 0.07      |
| 20/10/2010  | 24.35      | 26.52      | 0.24      | 0.06      | 0.27                                | 0.12      |
| 16/4/2011   | 6.40       | 7.11       | 0.20      | 0.01      | 0.07                                | 0.02      |
| 3/5/2011    | 5.55       | 6.55       | 0.07      | 0.12      | 0.08                                | 0.01      |
| 9/8/2011    | 2.44       | 11.12      | 0.62      | 0.04      | 0.05                                | 0.02      |
| 21/9/2011   | 2.45       | 2.93       | 0.10      | 0.16      | 0.04                                | 0.01      |

51

52

53 **Table G.** Stormwater pollutant loads rate transported by the first 40% of runoff volume ( $FF_{40}$ ) data  
 54 for DalingshanTongsha catchment

55

| <i>Date</i> | <i>COD</i> | <i>TSS</i> | <i>TN</i> | <i>TP</i> | <i>NH<sub>4</sub><sup>+</sup>-N</i> |
|-------------|------------|------------|-----------|-----------|-------------------------------------|
| 15/4/2009   | 0.62       | 0.66       | 0.73      | 0.66      | 0.87                                |
| 15/9/2009   | 0.50       | 0.55       | 0.58      | 0.72      | 0.58                                |
| 20/10/2009  | 0.49       | 0.54       | 0.64      | 0.63      | 0.57                                |
| 2/6/2010    | 0.48       | 0.48       | 0.53      | 0.57      | 0.51                                |
| 28/6/2010   | 0.56       | 0.58       | 0.70      | 0.70      | 0.61                                |
| 20/10/2010  | 0.58       | 0.65       | 0.71      | 0.63      | 0.79                                |
| 16/4/2011   | 0.57       | 0.64       | 0.80      | 0.75      | 0.67                                |
| 3/5/2011    | 0.47       | 0.41       | 0.38      | 0.50      | 0.43                                |
| 9/8/2011    | 0.60       | 0.63       | 0.52      | 0.76      | 0.66                                |
| 21/9/2011   | 0.51       | 0.50       | 0.58      | 0.58      | 0.53                                |

56

57

58 **Table H.** Stormwater pollutant loads rate transported by the first 40% of runoff volume ( $FF_{40}$ ) data  
 59 for Niushan catchment

| <i>Date</i> | <i>COD</i> | <i>TSS</i> | <i>TN</i> | <i>TP</i> | <i>NH<sub>4</sub><sup>+</sup>-N</i> |
|-------------|------------|------------|-----------|-----------|-------------------------------------|
| 15/4/2009   | 0.66       | 0.65       | 0.65      | 0.75      | 0.69                                |
| 15/9/2009   | 0.49       | 0.64       | 0.49      | 0.77      | 0.67                                |
| 20/10/2009  | 0.47       | 0.60       | 0.63      | 0.54      | 0.63                                |
| 2/6/2010    | 0.54       | 0.47       | 0.55      | 0.70      | 0.50                                |
| 28/6/2010   | 0.57       | 0.56       | 0.55      | 0.72      | 0.59                                |
| 20/10/2010  | 0.57       | 0.46       | 0.37      | 0.53      | 0.48                                |
| 16/4/2011   | 0.54       | 0.64       | 0.55      | 0.70      | 0.68                                |
| 3/5/2011    | 0.40       | 0.39       | 0.32      | 0.37      | 0.41                                |
| 9/8/2011    | 0.55       | 0.66       | 0.62      | 0.53      | 0.70                                |
| 21/9/2011   | 0.40       | 0.64       | 0.32      | 0.37      | 0.67                                |

60

61

62 **Table I.** Stormwater pollutant loads rate transported by the first 40% of runoff volume ( $FF_{40}$ ) data  
 63 for Tongsha catchment

| <i>Date</i> | <i>COD</i> | <i>TSS</i> | <i>TN</i> | <i>TP</i> | <i>NH<sub>4</sub><sup>+</sup>-N</i> |
|-------------|------------|------------|-----------|-----------|-------------------------------------|
| 15/4/2009   | 0.61       | 0.54       | 0.76      | 0.70      | 0.57                                |
| 15/9/2009   | 0.58       | 0.55       | 0.70      | 0.70      | 0.58                                |
| 20/10/2009  | 0.69       | 0.65       | 0.79      | 0.79      | 0.52                                |
| 2/6/2010    | 0.48       | 0.56       | 0.56      | 0.58      | 0.56                                |
| 28/6/2010   | 0.58       | 0.53       | 0.71      | 0.54      | 0.59                                |
| 20/10/2010  | 0.37       | 0.32       | 0.36      | 0.31      | 0.34                                |
| 16/4/2011   | 0.61       | 0.58       | 0.66      | 0.63      | 0.61                                |
| 3/5/2011    | 0.38       | 0.46       | 0.43      | 0.44      | 0.48                                |
| 9/8/2011    | 0.52       | 0.49       | 0.66      | 0.61      | 0.69                                |
| 21/9/2011   | 0.47       | 0.50       | 0.53      | 0.52      | 0.53                                |

64
